# Supplementary material for: Evaluation of scaling-up of HPV self-collection offered by community health workers at home visits to increase screening among socially vulnerable under-screened women in Jujuy Province, Argentina
Source: PubMed Central journal article supplement (PMC5307871; doi:10.1186/s13012-017-0548-1), 2017-02-13

←  
"Hacerte vos misma el test de VPH es fácil y seguro"

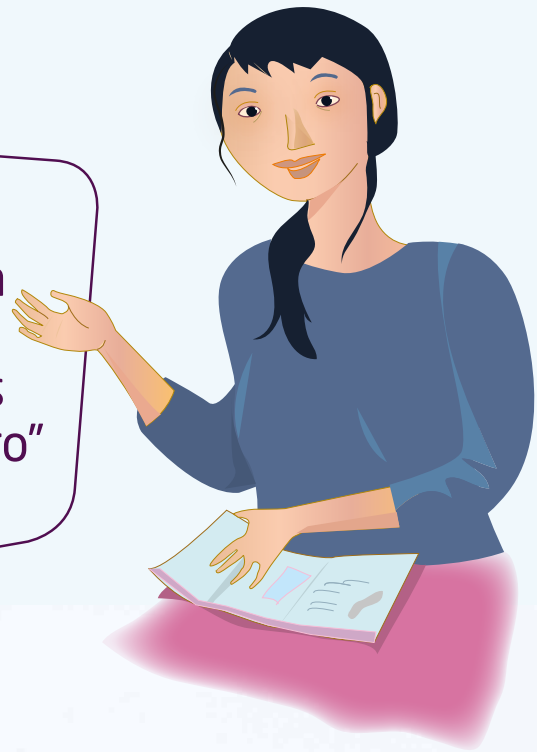

"Tubo colector y cepillo para la autotoma"

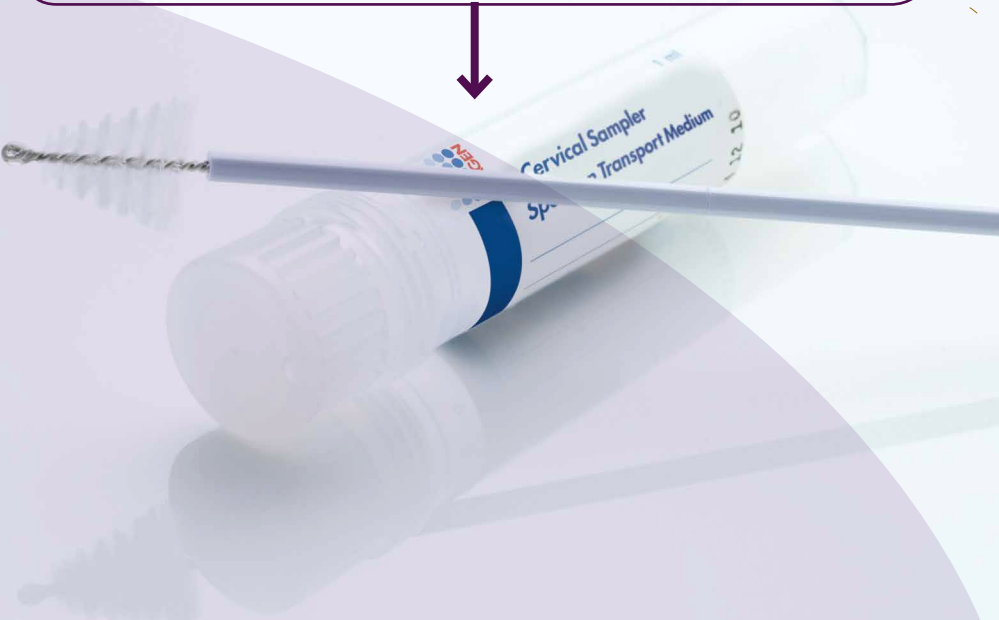

## El cáncer de cuello de útero SE PUEDE PREVENIR

Si sos mujer y tenés 30 años o más,  
podes hacerte el Test de VPH

Es tu  
derecho  
ES TU  
SALUD

0800 333 3586 - [www.msal.gov.ar/inc](http://www.msal.gov.ar/inc)

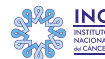

INC  
INSTITUTO  
NACIONAL  
DE CÁNCER

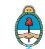

Ministerio de Salud  
Presidencia de la Nación

# TEST DE VPH

"Ahora me puedo hacer el test de VPH yo misma"

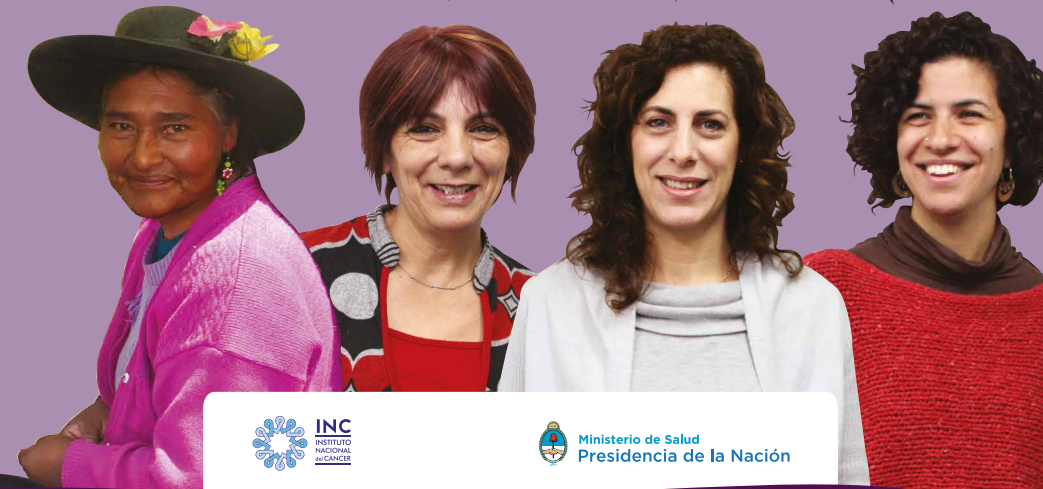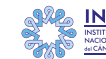

INC  
INSTITUTO  
NACIONAL  
DE CÁNCER

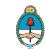

Ministerio de Salud  
Presidencia de la Nación

# "Seguí los siguientes pasos"

**1** Elegí el lugar de tu casa donde puedas tener privacidad.

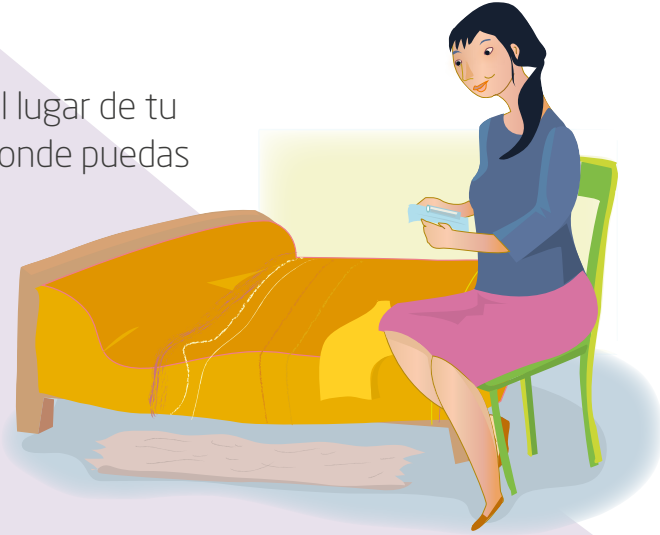

**2** Buscá una posición que te quede cómoda (puede ser en cuclillas, parada, acostada sobre una cama con las piernas flexionadas o con una pierna arriba de una silla)

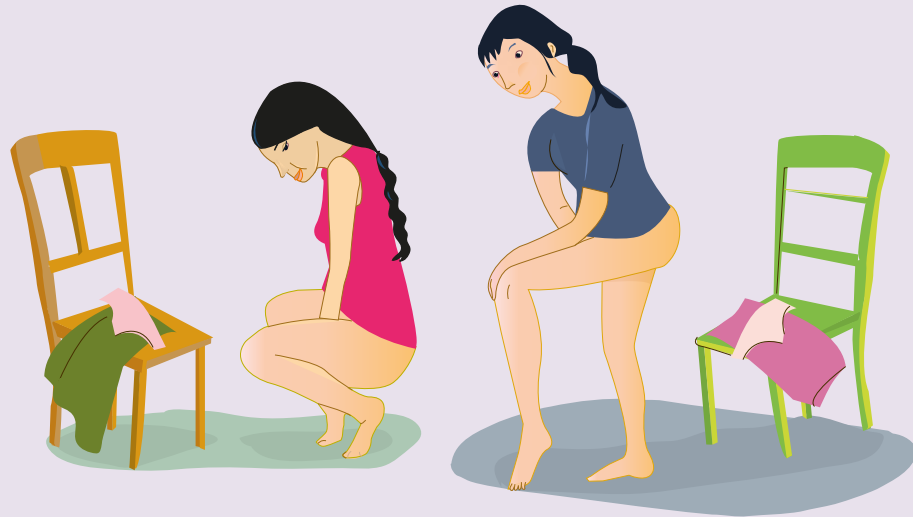

**3** Con las manos limpias y luego de sacarte la bombacha, destapá el tubo y apoyá la tapa boca arriba. Es muy importante que lo tengas parado así no se derrama el líquido que tiene adentro

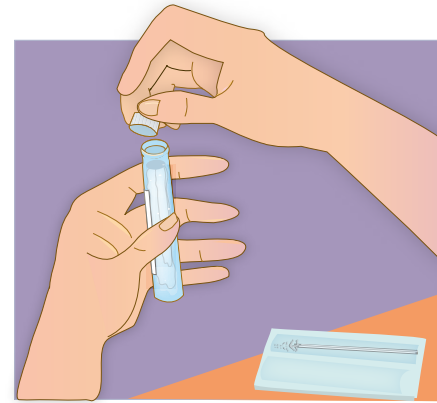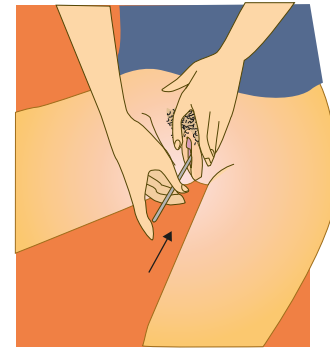

**4** Tomá el cepillo con las manos y metelo en la vagina hasta que haga tope. Aproximadamente lo estarías introduciendo 10cm

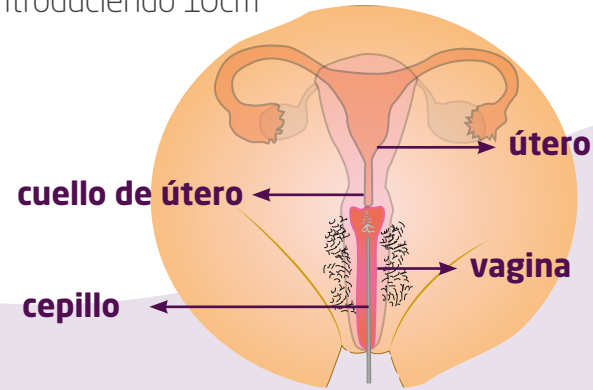

**5** Una vez que el cepillo esté adentro, giralo 3 veces y sacalo de la vagina

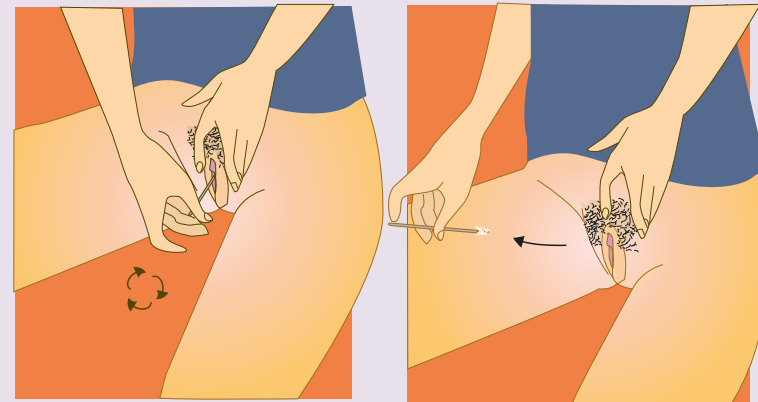

**6** Meté el cepillo adentro del tubo, quebralo por la parte marcada así podés tapanlo

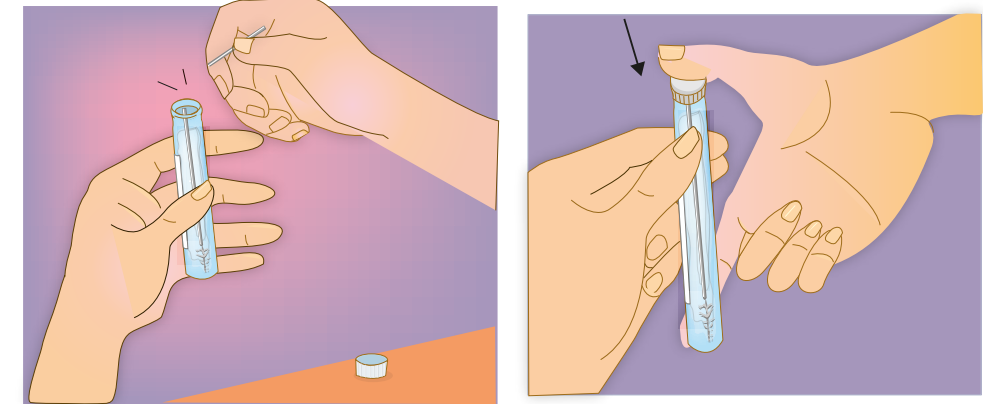

**7** Entregalo a tu agente sanitario para que lo lleve a analizar al laboratorio de VPH

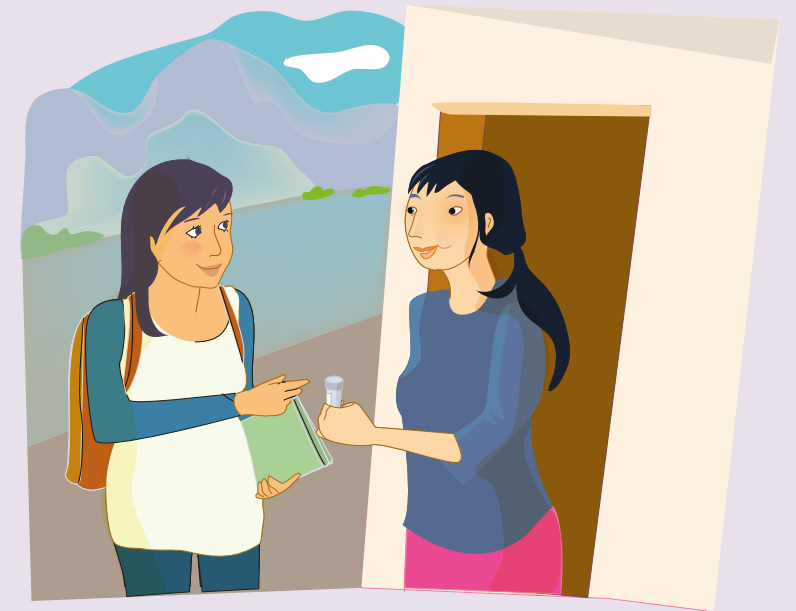

Supplement: 13012_2017_548_MOESM1_ESM.pdf [file 13012_2017_548_MOESM1_ESM.pdf]
